# Supplementary material
Source: publisher site journal article supplement (https://www.degruyterbrill.com/publication/isbn/9783110364408/downloadAsset/9783110364408_Inhalt.pdf)
Supplement: Supplementary file 1 [file 9783110364408_Inhalt.pdf]

# Inhalt

|                                                                                                                                                                        |   |
|------------------------------------------------------------------------------------------------------------------------------------------------------------------------|---|
| <i>Wolfgang Lukas, Rüdiger Nutt-Kofoth, Madleen Podewski</i><br>Zur Bedeutung von Materialität und Medialität für Edition und Interpretation.<br>Eine Einführung ..... | 1 |
|------------------------------------------------------------------------------------------------------------------------------------------------------------------------|---|

## I. Aspekte zu Theorie und Geschichte

|                                                                                                                               |    |
|-------------------------------------------------------------------------------------------------------------------------------|----|
| <i>Annika Rockenberger, Per Röcken</i><br>Wie ‚bedeutet‘ ein ‚material text‘? .....                                           | 25 |
| <i>Stephan Kammer</i><br>Das Stigma des Dokumentarischen. Zum historischen Apriori<br>philologischer Materialverachtung ..... | 53 |

## II. Skriptografische Materialität: Entwurfshandschriften

|                                                                                                                                                                                |     |
|--------------------------------------------------------------------------------------------------------------------------------------------------------------------------------|-----|
| <i>Almuth Grésillon</i><br>Erfahrungen mit Textgenese, ‚critique génétique‘ und Interpretation .....                                                                           | 67  |
| <i>Burghard Dedner</i><br>In loco auctoris. Über die Auflösung von Unbestimmtheiten durch den Editor<br>und die daraus resultierenden Metamorphosen des Textes .....           | 81  |
| <i>Johannes Barth</i><br>Materialität und Werkgenese: Achim von Arnims <i>Die Päpstin Johanna</i> .....                                                                        | 95  |
| <i>Johannes John</i><br>‚Übermalungen‘ – Transkription, Emendation, Interpretation. Zur<br>17. Manuskriptseite von Adalbert Stifters Erzählung <i>Nachkommenschaften</i> ..... | 107 |
| <i>Gabriele Sander</i><br>Alfred Döblins <i>Berlin Alexanderplatz</i> – ein multimediales Schreibprojekt .....                                                                 | 123 |
| <i>Kai Bremer</i><br>Medialität der Interlinearität. Überlegungen zu Heiner Müllers Übertragung<br>von Aischylos’ <i>Die Perser</i> .....                                      | 135 |

### III. Typografische Materialität I: Buch

*Thomas Rahn*

Gestörte Texte. Detailtypographische Interpretamente und Edition ..... 149

*Gabriele Wix*

Der Text erscheint selten nackt. Max Ernst, *La femme 100 têtes* ..... 173

*Franziska Mayer*

Zur Konstitution von ‚Bedeutung‘ bei der Buchgestaltung. Aspekte einer Semiotik des Buchs ..... 197

### IV. Typografische Materialität II: Buch vs. Zeitung/Zeitschrift

*Barbara von Reibnitz*

Erstdrucke in Zeitungen. Zur editorischen Kontextdokumentation am Beispiel von Robert Walsers Feuilletons ..... 219

*Michael Scheffel*

Überlegungen zum Verhältnis von Material, Medium und Text am Beispiel von Arthur Schnitzlers *Traumnovelle* ..... 235

*Gustav Frank*

„Heuschreckenschwärme von Schrift“. Zu ‚après-texte‘ und ‚mise en page‘ von Walter Benjamins *Einbahnstraße* ..... 251

### V. Nichtschriftliche Materialität I: Audiophone Varianz

*Andreas Meier*

Akustische Lesarten. Zum editionsphilologischen Umgang mit (Autoren-)Hörbüchern ..... 273

### VI. Nichtschriftliche Materialität II: Die ‚Schreibszene‘ jenseits des Textes

*Bodo Plachta*

„episches Hausgerät“ ..... 289
